# Supplementary material for: Evaluate Trends and Factors Associated with C-section and Inpatient Cost Among Low-risk Deliveries in Selected U.S. States
Source: Research Square preprint supplement (doi:10.21203/rs.3.rs-6785109/v1), 2025-06-23
Supplement: Supplementary file 1 [file 08e3596f028015af34f6ad6a.docx]

**Appendix Table 1**. ICD-10 codes used as exclusion criteria.

| **Exclusions** | **ICD-10 codes** |
| --- | --- |
| Not between 37 and 41 gestational weeks (ICD-10 codes) (Exclude based on surgery date) | Z3A.0 Less than 10 weeks  Z3A.1 10-19 weeks  Z3A.2 20-29 weeks  Z3A.31- Z3A.36 30-36 weeks  Z3A.42, Z3A.49 42 weeks and greater than 42 weeks |
| with more than one single fetus | Z37.2-Z37.9 |
| History of abortion | Z87.5 |
| abnormal weight (2500-3999 g) was constructed | P07 (low weight),  P08 (high weight)  P05 (Malnutrition) |
| Maternal care for other fetal problems | O36 |
| Maternal care for other (suspected) fetal abnormality and damage | O35.8 |
| Maternal care for malpresentation of fetus | O32 |
| Multiple gestation | O30 |
| Placenta Previa and related complications of pregnancy within 90 days | O43.21, O44.0, O44.1, O44.4 (low-lying placenta) |
| Eclampsia (a seizure disorder in pregnancy) | O15.0 |
| Preterm delivery (prior to thirty-seven weeks gestation) | O60 |
| Maternal care for abnormality of pelvic organs | O34 |
| Obstructed labor due to shoulder dystocia | O66.0 |
| Supervision of high risk pregnancy | O09 |
| Labor and delivery complicated by vasa previa | O69. 4 |
| Abnormalities of forces of labor | O62 |
| Encounter for antenatal screening of mother | Z36 |
| pre-eclampsia | O14 |
| Patients who had any prior pregnancy with a 4th degree perineal laceration in as far back as records are available | O70.3 |
| Other abnormal uterine and vaginal bleeding | N93 |
| Systemic lupus erythematosus (SLE) | M32 |
| History of uterine scar from previous surgery | Z98.891 |
| Herpes viral infection of urogenital system, unspecified | A60. 00 |
| **Maternal Medical Conditions** | **ICD-10 codes** |
| Amniotic fluid complications | O40, O41.0, O41.00X0 |
| Asthma | J45 |
| renal disease | N18 |
| cardiac disease | I51 |
| trauma | T14 |
| Diabetes | E10-E14 |
| Gestational diabetes | O24.319, O24.32, O24.93, O24.911, O24.93, O24.4 |
| Hypertension (including preeclampsia and eclampsia) | O10, I10, I11, I12.9, I13.0, I15.0 |
| Infections | B20, B01, B02, B00/A60, B06, B15-B19, 075. B27.90, B25.9, B97.35, B34.3, A50, B58, O98, O35.1, R75, Z21 |
| Mental health conditions | F039, F1099, V2349, F05, F04, F2089, F3010, F22, F29, F840, F419, F600, F66, F70, F71, F79, O99345 |
| Obesity | O99.21X, O98.4X, E66.9, V85.3X, V85.4X |
| Substance use (drugs, alcohol and tobacco) | F102, F112, F101, O99330 |
| history of substance abuse | Z86. 4 |
| Thyroid disorders | E040, E042, E0500, E009, E890, E061, E079, O9928 |

**Appendix Figure 1**. Selection of the study population.


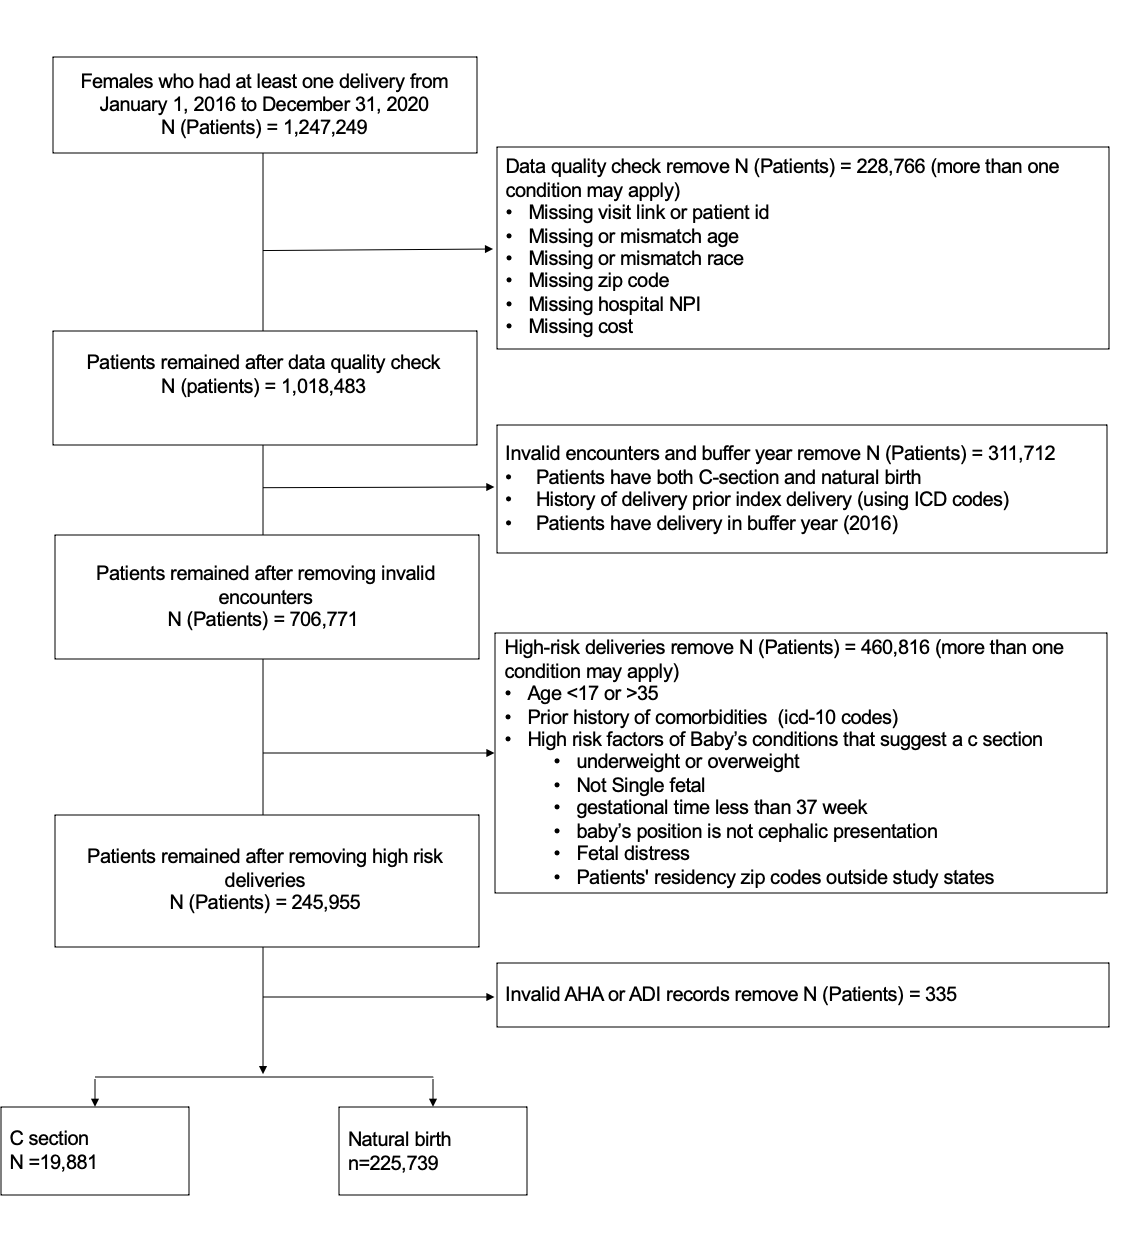


**Appendix Table 2**. Multivariable generalized estimating equation model assessing individual and hospital characteristics associated with c-section utilization, 2017-2020, Florida.

| **Characteristic** | **OR** | **95% CI** | **p-value** |
| --- | --- | --- | --- |
| **Age** | 1 | 1.0, 1.00 | 0.1 |
| **Race** |  |  |  |
| White | — | — |  |
| Asian | 1.07 | 1.01, 1.13 | 0.018 |
| Black | 1.17 | 1.13, 1.21 | <0.001 |
| Hispanic | 1.32 | 1.28, 1.37 | <0.001 |
| Others | 1.14 | 1.08, 1.21 | <0.001 |
| **Insurance Type** |  |  |  |
| Medicaid | — | — |  |
| Other | 1.09 | 1.04, 1.15 | <0.001 |
| Private Insurance | 1.17 | 1.14, 1.20 | <0.001 |
| **Median Household Income Quantile** |  |  |  |
| 1 | — | — |  |
| 2 | 0.99 | 0.96, 1.02 | 0.6 |
| 3 | 1 | 0.96, 1.03 | 0.8 |
| 4 | 1.01 | 0.96, 1.06 | 0.7 |
| **Hospital Beds** |  |  |  |
| < 200 | — | — |  |
| 200 - 400 | 1.13 | 1.06, 1.21 | <0.001 |
| 400 - 600 | 0.87 | 0.80, 0.94 | <0.001 |
| 600 - 1000 | 0.85 | 0.78, 0.94 | <0.001 |
| >1000 | 0.83 | 0.76, 0.90 | <0.001 |
| **Hospital Type** |  |  |  |
| Government,   Nonfederal | — | — |  |
| Investor-owned   (for-profit) | 1.09 | 1.00, 1.18 | 0.038 |
| Nongovernment,   not-for-profit | 0.93 | 0.87, 0.99 | 0.032 |
| **Teaching Hospital** |  |  |  |
| No | — | — |  |
| Yes | 1.04 | 0.96, 1.12 | 0.4 |

**Appendix Table 3**. Multivariable generalized estimating equation model assessing individual and hospital characteristics associated with c-section utilization, 2017-2020, Maryland.

| **Characteristic** | **OR** | **95% CI** | **p-value** |
| --- | --- | --- | --- |
| **Age** | 0.99 | 0.99, 1.00 | 0.005 |
| **Race** |  |  |  |
| White | — | — |  |
| Asian | 1.04 | 0.98, 1.11 | 0.2 |
| Black | 1.11 | 1.05, 1.18 | <0.001 |
| Hispanic | 0.79 | 0.74, 0.84 | <0.001 |
| Others | 1.02 | 0.94, 1.11 | 0.6 |
| **Insurance Type** |  |  |  |
| Medicaid | — | — |  |
| Other | 1.01 | 0.94, 1.08 | 0.8 |
| Private Insurance | 1.11 | 1.06, 1.16 | <0.001 |
| **Median Household Income Quantile** |  |  |  |
| 1 | — | — |  |
| 2 | 1.04 | 0.94, 1.15 | 0.4 |
| 3 | 0.96 | 0.87, 1.06 | 0.4 |
| 4 | 0.89 | 0.81, 0.99 | 0.027 |
| **Hospital Beds** |  |  |  |
| < 200 | — | — |  |
| 200 - 400 | 0.93 | 0.80, 1.09 | 0.4 |
| 400 - 600 | 0.63 | 0.50, 0.79 | <0.001 |
| 600 - 1000 | 0.58 | 0.34, 0.98 | 0.043 |
| >1000 | 0.67 | 0.41, 1.09 | 0.11 |
| **Teaching Hospital** |  |  |  |
| No | — | — |  |
| Yes | 1.23 | 0.88, 1.72 | 0.2 |

**Appendix Table 4**. Multivariable generalized estimating equation model assessing individual and hospital characteristics associated with c-section utilization, 2017-2020, Wisconsin.

| **Characteristic** | **OR** | **95% CI** | **p-value** |
| --- | --- | --- | --- |
| **Age** | 0.99 | 0.98, 1.00 | <0.001 |
| **Race** |  |  |  |
| White | — | — |  |
| Asian | 0.88 | 0.81, 0.95 | 0.002 |
| Black | 1.03 | 0.93, 1.13 | 0.6 |
| Hispanic | 0.85 | 0.78, 0.92 | <0.001 |
| Others | 0.9 | 0.71, 1.13 | 0.3 |
| **Insurance Type** |  |  |  |
| Medicaid | — | — |  |
| Other | 1.32 | 1.17, 1.49 | <0.001 |
| Private Insurance | 1.19 | 1.13, 1.26 | <0.001 |
| **Median Household Income Quantile** |  |  |  |
| 1 | — | — |  |
| 2 | 1.05 | 0.97, 1.14 | 0.2 |
| 3 | 1.04 | 0.96, 1.13 | 0.4 |
| 4 | 0.96 | 0.87, 1.06 | 0.4 |
| **Hospital Beds** |  |  |  |
| < 200 | — | — |  |
| 200 - 400 | 0.86 | 0.75, 1.00 | 0.049 |
| 400 - 600 | 0.83 | 0.45, 1.56 | 0.6 |
| **Hospital Type** |  |  |  |
| Investor-owned   (for-profit) | — | — |  |
| Nongovernment,   not-for-profit | 1.23 | 0.80, 1.90 | 0.3 |
| **Teaching Hospital** |  |  |  |
| No | — | — |  |
| Yes | 1.06 | 0.62,1.82 | 0.8 |
